# Supplementary material
Source: Springer Nature journal article supplement (https://www.springermedizin.de/resource/supplementary/12965_2009_75_MOESM3_ESM.pdf/9573066)

### Mean time of tumour appearance

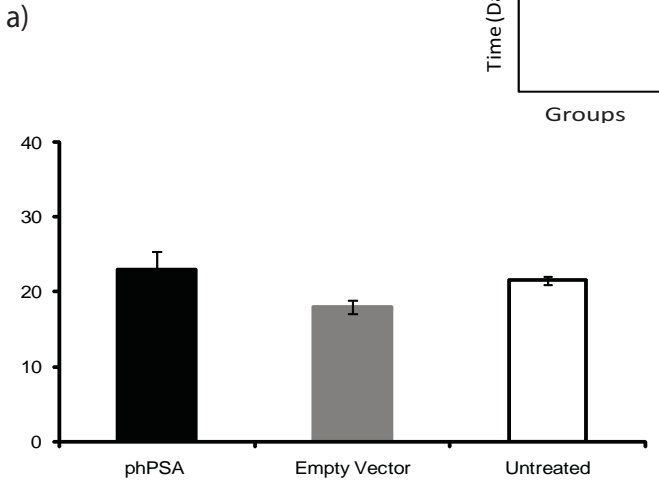

### Tumour Growth

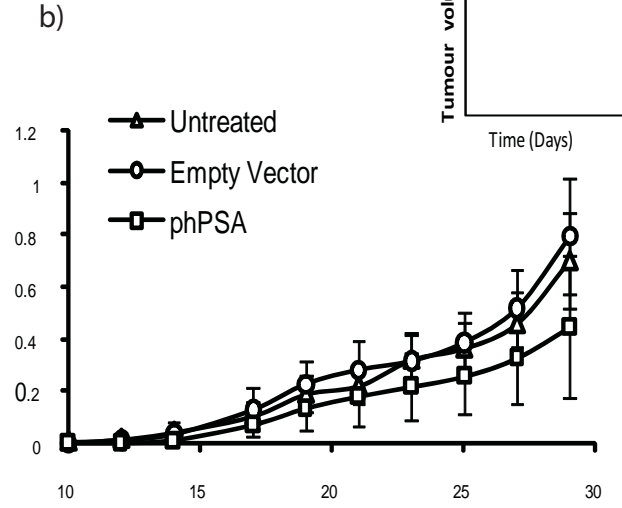

### Survival

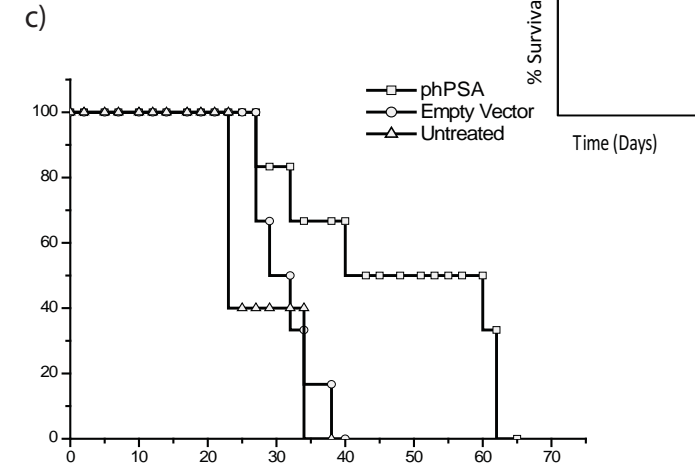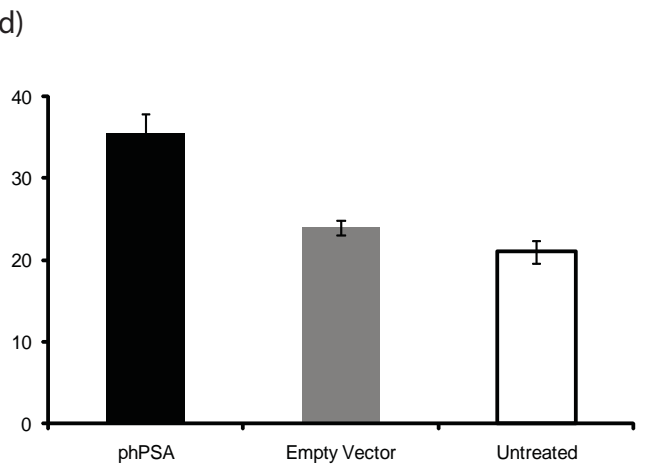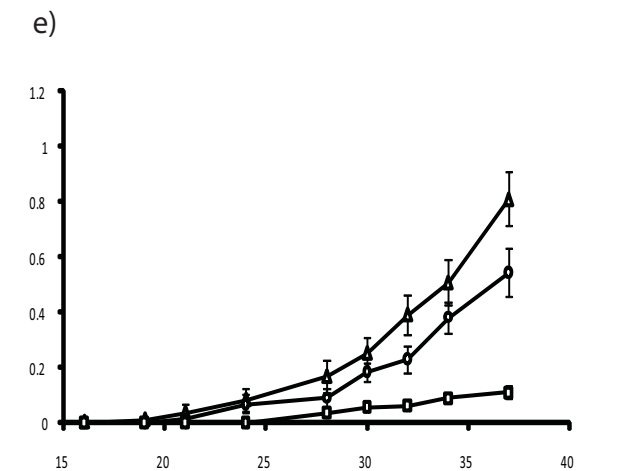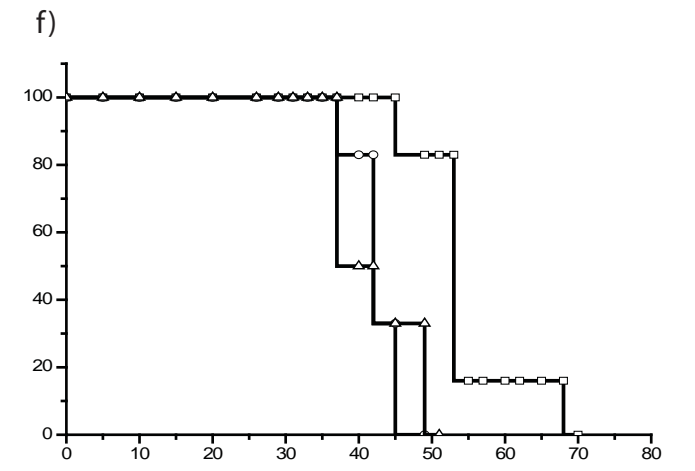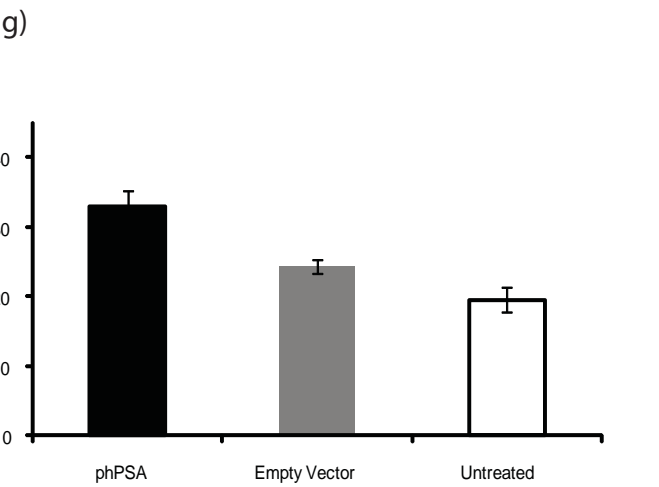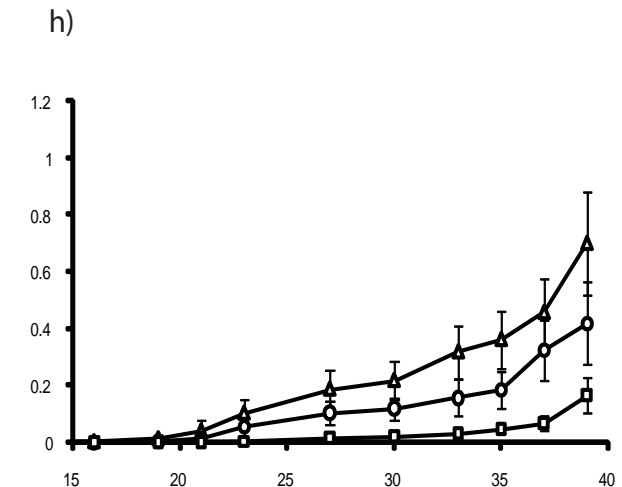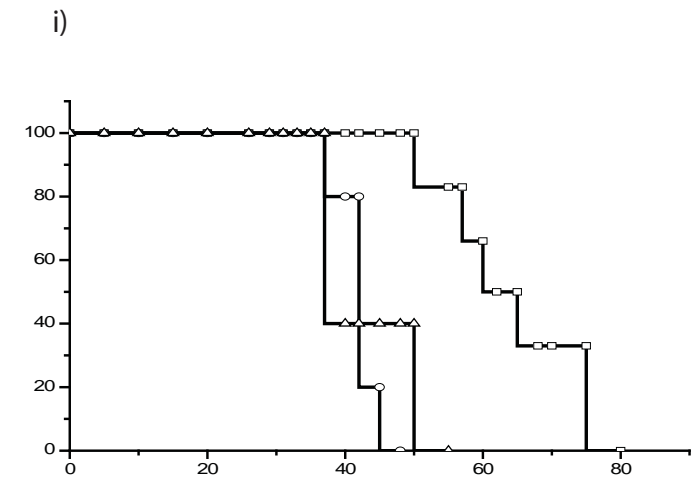

Supplement: MOESM3 [file 9573066]
